# Supplementary material for: Homogeneous deposition of Ni(OH)2 onto cellulose-derived carbon aerogels for low-cost energy storage electrodes
Source: Royal Society of Chemistry journal article supplement (doi:10.1039/c6ra26566a), 2017-01-01
Supplement: c6ra26566a1.pdf [file c6ra26566a1.pdf]

Electronic Supplementary Information

## **Homogeneous Deposition of Ni(OH)<sub>2</sub> onto Cellulose-Derived Carbon Aerogels for Low-Cost Energy Storage Electrodes**

Guoqing Zu, <sup>\*a,b,c</sup> Jun Shen, <sup>\*b</sup> Zhihua Zhang, <sup>b</sup> Bin Zhou, <sup>b</sup> Xiaodong Wang, <sup>b</sup> Guangming Wu, <sup>b</sup> and Yewen Zhang<sup>c</sup>

<sup>a</sup>Tongji University, Shanghai, 200092, PR China

<sup>b</sup>Shanghai Key Laboratory of Special Artificial Microstructure Materials and Technology, Pohl Institute of Solid State Physics, Tongji University, Shanghai, 200092, PR China

<sup>c</sup>School of Electronics and Information Engineering, Tongji University, Shanghai, 200092, PR China

\*Corresponding authors. E-mail: guoqingzu@yahoo.com (G. Zu); shenjun67@tongji.edu.cn

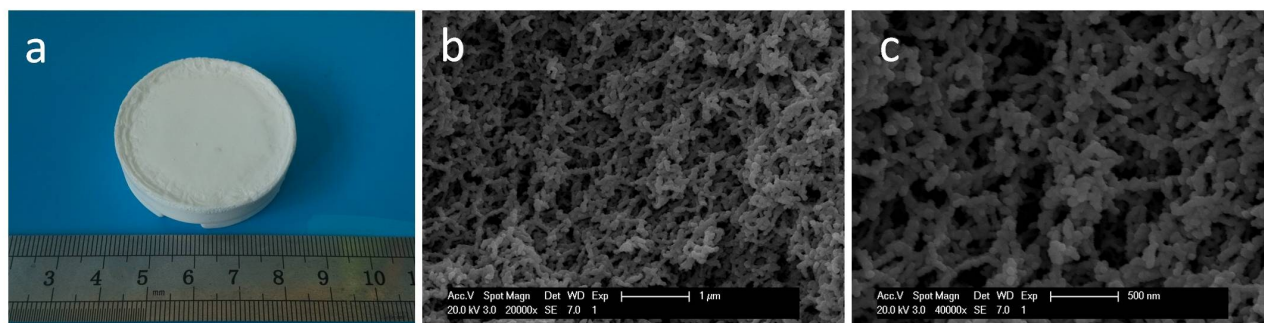

**Figure S1.** (a) Photograph and (b,c) SEM images of cellulose aerogel. The obtained cellulose aerogel is monolithic and maintains the initial shape of the cellulose wet gel. It exhibits interconnected fibrous nanoparticles and abundant nanopores.

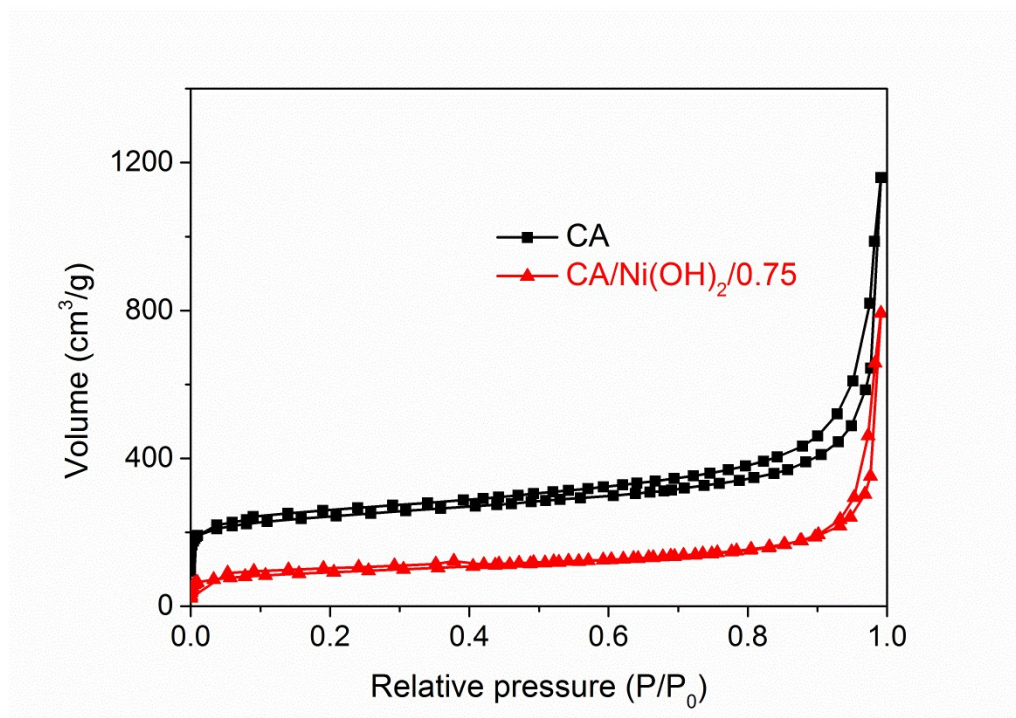

**Figure S2.** N<sub>2</sub> adsorption/desorption isotherms of the nanocellulose-derived CA and CA/Ni(OH)<sub>2</sub>/0.75.

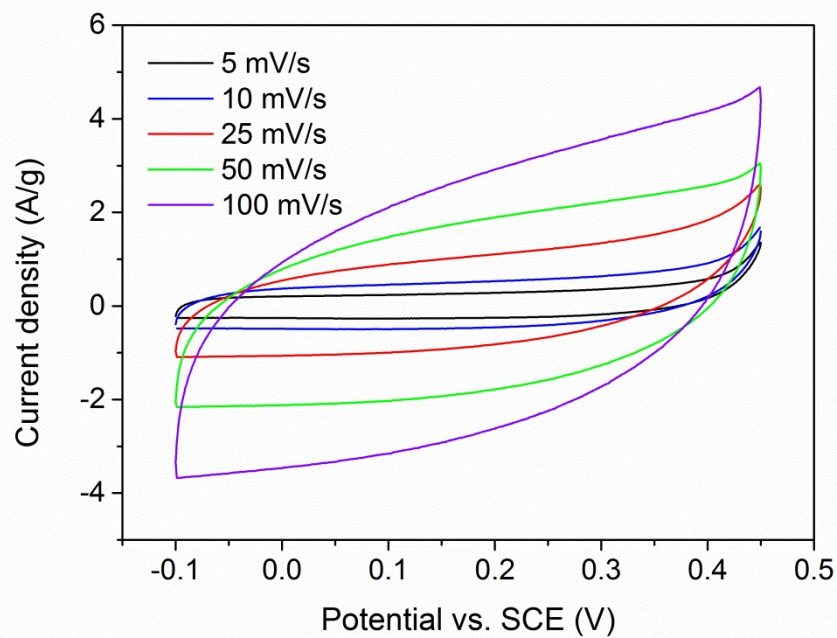

**Figure S3.** CV curves of nanocellulose-derived CA within the potential window of -0.1 to 0.45 V at different scan rates.

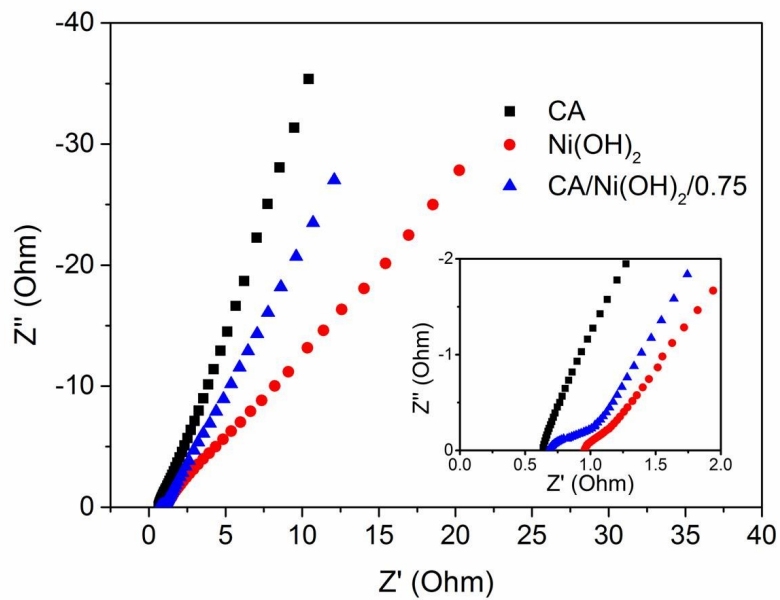

**Figure S4.** Nyquist curves of nanocellulose-derived CA, Ni(OH)<sub>2</sub>, and CA/Ni(OH)<sub>2</sub>/0.75. The inset shows the expanded high-frequency region of the curves.
